# Supplementary material for: Comprehensively Profiling the Chromatin Architecture of Tissue Restricted Antigen Expression in Thymic Epithelial Cells Over Development
Source: Front Immunol. 2018 Sep 19;9:2120. doi: 10.3389/fimmu.2018.02120 (PMC6156148; doi:10.3389/fimmu.2018.02120)
Supplement: Supplementary Table 3 — Enrichment of histone ChIP-seq peaks differentially detected in mTEClo or mTEChi within AIRE-enhanced and AIRE-independent TRAs. GAT was used to test enrichment of histone ChIP-seq peaks with differential signal in mTEClo or mTEChi within AIRE independent (blue) and AIRE induced (red) TRAs +/– 5 kb. [file Table_3.XLSX]

## Sheet: Sheet1
tau >= 0.8 - diffbind
Segment	Annotation	Log2fold	Log2fold l95CI	Log2fold u95CI	Pval	Qval	Comparison log2fold	Comparison pval	Comparison qval
mTEChi H3K27me3	Aire independent tau gt eq 0.8	0.0640002	-0.160839	0.341028	0.3375	0.3375	-0.00714547	0.982495	0.982495
mTEChi H3K27me3	Aire induced tau gt eq 0.8	-0.0827247	-0.352613	0.237845	0.3305	0.3375	0.0358819	0.926744	0.982495
mTEChi H3K4me1	Aire independent tau gt eq 0.8	0.244579	0.186979	0.305044	0.0001	0.000133333	-0.167824	0.0504338	0.0806941
mTEChi H3K4me1	Aire induced tau gt eq 0.8	-0.389469	-0.462372	-0.312465	0.0001	0.000133333	0.292704	0.00731144	0.0146229
mTEChi H3K4me3	Aire independent tau gt eq 0.8	0.547727	0.445869	0.657722	0.0001	0.000133333	-0.48573	0.00182346	0.00486255
mTEChi H3K4me3	Aire induced tau gt eq 0.8	-1.48198	-1.62155	-1.32874	0.0001	0.000133333	1.40465	<0.0001	<0.0001
mTEChi H3K9ac	Aire independent tau gt eq 0.8	0.541665	0.440776	0.649832	0.0001	0.000133333	-0.19086	0.280519	0.374025
mTEChi H3K9ac	Aire induced tau gt eq 0.8	-1.41113	-1.54768	-1.2623	0.0001	0.000133333	0.86993	<0.0001	0.000183098
mTEClo H3K27me3	Aire independent tau gt eq 0.8	0.0568547	-0.135275	0.279896	0.3289	0.375886
mTEClo H3K27me3	Aire induced tau gt eq 0.8	-0.0468428	-0.281207	0.229278	0.3863	0.3863
mTEClo H3K4me1	Aire independent tau gt eq 0.8	0.0767544	0.0154406	0.139935	0.0189	0.0504
mTEClo H3K4me1	Aire induced tau gt eq 0.8	-0.0967649	-0.173622	-0.0150036	0.0269	0.0538
mTEClo H3K4me3	Aire independent tau gt eq 0.8	0.0619967	-0.0468247	0.181687	0.184	0.245333
mTEClo H3K4me3	Aire induced tau gt eq 0.8	-0.0773262	-0.205183	0.06027	0.1776	0.245333
mTEClo H3K9ac	Aire independent tau gt eq 0.8	0.350805	0.218484	0.503816	0.0001	0.0004
mTEClo H3K9ac	Aire induced tau gt eq 0.8	-0.541204	-0.695222	-0.377816	0.0001	0.0004
